# Supplementary material for: ENO3 promotes colorectal cancer progression by enhancing cell glycolysis
Source: Research Square preprint supplement (doi:10.21203/rs.3.rs-1243620/v1), 2022-01-12
Supplement: Supplementary file 1 [file 0c7aad62b69c2e381f171802.docx]

| Supplementary Table1. Primer sequence for qPCR | |
| --- | --- |
| Primers | Sequence (5' to 3') |
| β-actin-F | ACTACATTCAATTCCATC |
| β-actin-R | CTAGAAGCACTTGCG GTG |
| ENO3-F | GGCCACTTGGACCTCCTT C |
| ENO3-R | GCCATTAGACTGAGCCAGTTTG |
| NFAT5-F | CCTAATGCCCTGATGACTCCAC |
| NFAT5-R | GTTTGCTGAGTTGATCCAACAGAC |
| MAFF-F | CTGTCGGACGAGGCGCTGATG |
| MAFF-R | AGCCACGGTTTTTGAGTGTGCG |
| SLC25A43-F | TTCTCAGGAGCAGTGGACTGCT |
| SLC25A43-R | TCTCTTGCAGAACTCAAAGGTGC |
| DCTN4-F | GGATGAAGTGGAACCTCTACCTG |
| DCTN4-R | GATGTTTGTGGCGAGGATAGAGC |
| SOCS7-F | CCAGGCCCTGAATTACCTCC |
| SOCS7-R | CGACTGAGGCGGATTTTGAAG |
| YTHDF3-F | GGTGTATTTAGTCAACCTGGGG |
| YTHDF3-R | AAGAGAACTAGGTGGATAGCCAT |
| SKA1-F | CCTGAACCCGTAAAGAAGCCT |
| SKA1-R | TCATGTACGAAGGAACACCATTG |
| IER2-F | ACTGGTCCCGAGCAAGAAAG |
| IER2-R | CGACTTCGGATGACGCTCC |
| SLC6A6-F | GGAGAAGTGGTCTAGCAAGATCG |
| SLC6A6-R | AGAAACGCACCTCCACCATTC |
| ASB1-F | GGCTCCGCAGGTCGTAATC |
| ASB1-R | CCCGACGTAAGCTGCATCAT |
| KITLG-F | AATCCTCTCGTCAAAACTGAAGG |
| KITLG-R | CCATCTCGCTTATCCAACAATGA |
| SLC10A3-F | CAACAAGTGTTCGTTTGGGTG |
| SLC10A3-R | CCATGAGGAAAGCGTACAAGG |
| POLR3G-F | GAGGACGTGCTGCTTATACCT |
| POLR3G-R | CTGTTCTGCGGCATCATCGT |
|  |  |
